# Supplementary material for: Cardiac LXRα protects against pathological cardiac hypertrophy and dysfunction by enhancing glucose uptake and utilization
Source: PubMed Central journal article supplement (PMC4568954; doi:10.15252/emmm.201404669), 2015-07-14

Full unedited blots for Suppl Fig 1, panel J

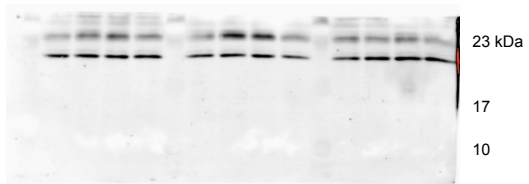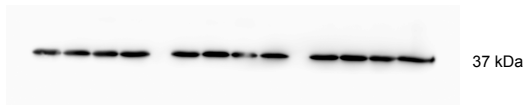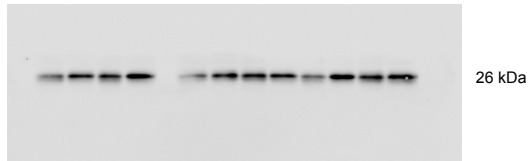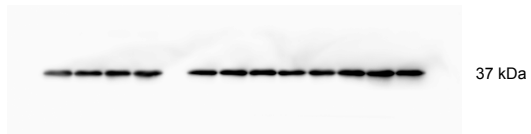

Supplement: emmm0007-1229-sd2.pdf [file emmm0007-1229-sd2.pdf]
